# Supplementary material for: Lepocreadiidae Odhner, 1905 and Aephnidiogenidae Yamaguti, 1934 (Digenea: Lepocreadioidea) of fishes from Moreton Bay, Queensland, Australia, with the erection of a new family and genus
Source: PubMed Central journal article supplement (PMC5993846; doi:10.1007/s11230-018-9803-3), 2018-05-31
Supplement: 11230_2018_9803_MOESM1_ESM.pdf [file 11230_2018_9803_MOESM1_ESM.pdf]

**Electronic supplementary material for**

**Lepocreadiidae Odhner, 1905 and Aepheidiogenidae Yamaguti, 1934 (Digenea: Lepocreadioidea) of fishes from  
Moreton Bay, Queensland, Australia, with the erection of a new family and genus**

**Rodney A. Bray • Thomas H. Cribb • Scott C. Cutmore**

Rodney A. Bray (✉)

Department of Life Sciences, Natural History Museum, Cromwell Road, London SW7 5BD, UK

e-mail: rab@nhm.ac.uk

Thomas H. Cribb • Scott C. Cutmore

The University of Queensland, School of Biological Sciences, St Lucia, Queensland 4072, Australia

**Supplementary Table 1** Measurements and ratios of *Bianium arabicum*, *B. plicatum* and *B. dayawanense*, original and from the literature.

| Species                                    | <i>Bianium arabicum</i>           |                                         |                                   | <i>Bianium 'plicatum'</i>       | <i>Bianium dayawanense</i>                  | <i>Bianium plicatum</i>             |                                 |
|--------------------------------------------|-----------------------------------|-----------------------------------------|-----------------------------------|---------------------------------|---------------------------------------------|-------------------------------------|---------------------------------|
|                                            | <i>Lagocephalus lunaris</i>       |                                         |                                   | <i>Lagocephalus lunaris</i>     | <i>Lagocephalus lunaris</i>                 | <i>Torquigener squamicauda</i>      | <i>Torquigener pleurogramma</i> |
| Host                                       |                                   |                                         |                                   | Madras                          | Daya Bay, China                             | Moreton Bay                         | Moreton Bay                     |
| Locality                                   | Moreton Bay                       | Kuwait Bay                              | New Caledonia                     |                                 |                                             |                                     |                                 |
| <i>n</i>                                   | 3                                 | 36                                      | 15§                               |                                 | 4                                           | 3                                   | 1 <sup>a</sup>                  |
| Source                                     | This study                        | Sey (1996)                              | Bray & Justine (2010)             | Hafeezullah (1970) <sup>c</sup> | Shen & Tong (1990)                          | This study                          | This study                      |
| Body                                       | 934–1,420 × 369–429 (1,251 × 403) | 650 [790 <sup>b</sup> ]-1,025 × 300–380 | 852–1,225 × 263–416 (1,031 × 349) | 1,035 × 352                     | 1,343 [1,586 <sup>b</sup> ]-1,887 × 391–425 | 1,099–1,427 × 552–797 (1,281 × 688) | –                               |
| Forebody                                   | 286–377 (345)                     | 249 <sup>b</sup>                        | 277–358                           | 259                             | 314 <sup>b</sup>                            | 356–480                             | 505                             |
| Pre-oral lobe                              | 40–71 (55)                        | 47 <sup>b</sup>                         | 42–74 (325 × 58)                  | 30                              | 34–102                                      | 28–75 (429 × 54)                    | 52                              |
| Oral sucker                                | 95–138 × 114–148 (123 × 134)      | 70–104 × 65–113                         | 105–131 × 107–133 (116 × 122)     | 105 × 105                       | 85–153 × 85–153                             | 163–184 × 181–215 (176 × 193)       | 200 × 230                       |
| Prepharynx                                 | 0                                 | 0+                                      | 0                                 | 0                               | 25–34                                       | 0                                   | 0                               |
| Pharynx                                    | 74–126 × 79–111 (105 × 100)       | 65–95 × 65–78                           | 89–126 × 86–135 (105 × 109)       | 82 × 82                         | 51–102 × 68–102                             | 99–116 × 116–132 (108 × 123)        | 157 × 181                       |
| Oesophagus                                 | 19–28 (25)                        | 0+                                      | 12–22 (17)                        | 9                               | 34 [29 <sup>b</sup> ]-68                    | 4–59 (36)                           | 19                              |
| Intestinal bifurcation to ventral sucker   | 46–68 (55)                        | 53 <sup>b</sup>                         | 27–62 (49)                        | 37                              | 74 <sup>b</sup>                             | 37–126 (67)                         | 99                              |
| Vitellarium to ventral sucker              | 0–44 (15)                         | 11 <sup>b</sup>                         | 0–36 (4)                          | 0                               | 0 <sup>b</sup>                              | 0–120 (52)                          | 133                             |
| Ventral sucker                             | 83–111 × 110–121 (98 × 114)       | 67–90 × 65–90                           | 82–108 × 82–105 (97 × 96)         | 88 × 96                         | 102–136 × 102–136                           | 172–199 × 171–215 (186 × 195)       | 181 × 209                       |
| Cirrus-sac                                 | 252–315 × 122–141 (293 × 128)     | 120–128 × 40–50                         | 195–294 × 46–121 (215 × 97)       | 217 × 67                        | 238–340 × 68–153                            | 271–354 × 74–109 (311 × 92)         | 455 × 162                       |
| External seminal vesicle to ventral sucker | 172–251 (224)                     | –                                       | 63–188 (135)                      | 150                             | 248 <sup>b</sup>                            | 47–120 (76)                         | 249                             |
| Ventral sucker to ovary                    | 117–240 (199)                     | 120 <sup>b</sup>                        | 100–154 (124)                     | 165                             | 277 <sup>b</sup>                            | 18–83 (43)                          | 104                             |
| Ovary                                      | 111–143 × 175–206 (128 × 187)     | 80–100 × 45–60                          | 50–158 × 94–182 (100 × 132)       | 75 × 127                        | 187–221 × 170–272                           | 96–161 × 160–222 (135 × 181)        | –                               |
| Ovary to anterior testis                   | 0                                 | 0                                       | 0–70 (5)                          | 0                               | 0                                           | 0                                   | –                               |

| Species                                                  | <i>Bianium arabicum</i>       |                   |                              | <i>Bianium 'plicatum'</i>       | <i>Bianium dayawanense</i>  | <i>Bianium plicatum</i>        |                                 |
|----------------------------------------------------------|-------------------------------|-------------------|------------------------------|---------------------------------|-----------------------------|--------------------------------|---------------------------------|
|                                                          | <i>Lagocephalus lunaris</i>   |                   |                              | <i>Lagocephalus lunaris</i>     | <i>Lagocephalus lunaris</i> | <i>Torquigener squamicauda</i> | <i>Torquigener pleurogramma</i> |
| Host                                                     |                               |                   |                              | Madras                          | Daya Bay, China             | Moreton Bay                    | Moreton Bay                     |
| Locality                                                 | Moreton Bay                   | Kuwait Bay        | New Caledonia                |                                 |                             |                                |                                 |
| <i>n</i>                                                 | 3                             | 36                | 15§                          |                                 | 4                           | 3                              | 1 <sup>a</sup>                  |
| Source                                                   | This study                    | Sey (1996)        | Bray & Justine (2010)        | Hafeezullah (1970) <sup>c</sup> | Shen & Tong (1990)          | This study                     | This study                      |
| Anterior testis                                          | 111–150 × 104–158 (135 × 130) | 85–104 × 88–130   | 86–163 × 92–143 (121 × 111)  | 180 × 143                       | 187–238 × 119–204           | 182–244 × 146–174 (213 × 164)  | –                               |
| Distance between testes                                  | 0                             | 0                 | 0                            | 0                               | 0                           | 0–16 (7)                       | –                               |
| Posterior testis                                         | 147–235 × 130–167 (198 × 151) | 104–130 × 85–130  | 101–194 × 76–131 (145 × 109) | 232 × 142                       | 204–396 × 119–221           | 194–255 × 164–195 (230 × 176)  | –                               |
| Post-testicular distance                                 | 138–250 (202)                 | 115*              | 135–253 (186)                | 172                             | 301 <sup>b</sup>            | 230–334 (266)                  | –                               |
| Post-caecal distance                                     | 0                             | 0                 | 0                            | 0                               | 0                           | 0                              | –                               |
| Eggs                                                     | 57–64 × 37–51 (60 × 43)       | 59–65 × 34–36     | 58–65 × 26–39 (62 × 32)      | –                               | 48–54 × 30–39               | 65–71 × 28–39 (68 × 33)        | 61 × 35                         |
| Width %                                                  | 29.4–39.5 (33.0)              | 37.1–37.1         | 29.1–37.6 (33.8)             | 34.0                            | 22.5–29.1                   | 50.2–55.8 (53.4)               | –                               |
| Forebody %                                               | 26.6–30.6 (27.9)              | 31.5 <sup>b</sup> | 29.1–34.7 (31.7)             | 25.0                            | 19.8 <sup>b</sup>           | 31.6–36.5 (33.5)               | –                               |
| Sucker length ratio 1:                                   | 0.75–0.87 (0.81)              | 0.87–0.96         | 0.74–0.94 (0.84)             | 0.84                            | 0.88–1.20                   | 1.02–1.08 (1.05)               | 0.91                            |
| Sucker width ratio 1:                                    | 0.79–0.97 (0.86)              | 0.80–1.00         | 0.71–0.83 (0.79)             | 0.91                            | 0.88–1.20                   | 0.95–1.09 (1.01)               | 0.91                            |
| Oral sucker: pharynx width 1:                            | 1.27–1.45 (1.36)              | 0.69–1.00         | 0.96–1.24 (1.13)             | 0.78                            | 0.76–0.80                   | 1.51–1.63 (1.56)               | 1.27                            |
| Ventral sucker to ovary %                                | 12.5–17.2 (15.5)              | 15.2 <sup>b</sup> | 9.03–14.2 (12.1)             | 15.9                            | 17.5 <sup>b</sup>           | 1.67–5.80 (3.20)               | –                               |
| External seminal vesicle to ventral sucker % of VS-Ovary | 104–148 (119)                 | –                 | 46–172 (110)                 | 104                             | 89.5 <sup>b</sup>           | 145–337 (216)                  | 238                             |
| Post-testicular distance%                                | 14.8–17.9 (16.0)              | 14.6 <sup>b</sup> | 15.7–22.9 (18.0)             | 16.6                            | 19.0 <sup>b</sup>           | 17.7–23.4 (20.7)               | –                               |
| Prepharynx %                                             | 0                             | 0                 | 0                            | 0                               | 1.86–1.80 <sup>b</sup>      | 0                              | –                               |
| Oesophagus%                                              | 1.97–1.99 (1.98)              | 0                 | 1.09–2.17 (1.62)             | 0.87                            | 2.53–3.60 <sup>b</sup>      | 0.29–4.14 (2.85)               | –                               |
| IB-VS %                                                  | 3.24–5.59 (4.56)              | 6.71 <sup>b</sup> | 3.09–6.12 (4.76)             | 6.12                            | 4.67 <sup>b</sup>           | 2.62–9.57 (5.19)               | –                               |

| Species                                              | <i>Bianium arabicum</i>     |                   |                       | <i>Bianium 'plicitum'</i>       | <i>Bianium dayawanense</i>  | <i>Bianium plicitum</i>        |                                 |
|------------------------------------------------------|-----------------------------|-------------------|-----------------------|---------------------------------|-----------------------------|--------------------------------|---------------------------------|
|                                                      | <i>Lagocephalus lunaris</i> |                   |                       | <i>Lagocephalus lunaris</i>     | <i>Lagocephalus lunaris</i> | <i>Torquigener squamicauda</i> | <i>Torquigener pleurogramma</i> |
| Host                                                 |                             |                   |                       | Madras                          | Daya Bay, China             | Moreton Bay                    | Moreton Bay                     |
| Locality                                             | Moreton Bay                 | Kuwait Bay        | New Caledonia         |                                 |                             |                                |                                 |
| <i>n</i>                                             | 3                           | 36                | 15§                   |                                 | 4                           | 3                              | 1 <sup>a</sup>                  |
| Source                                               | This study                  | Sey (1996)        | Bray & Justine (2010) | Hafeezullah (1970) <sup>c</sup> | Shen & Tong (1990)          | This study                     | This study                      |
| Vitellarium to ventral sucker distance %             | 0–4.66 (1.55)               | 1.39 <sup>b</sup> | 0–3.93 (0.42)         | 0                               | 0                           | 0–8.38 (3.91)                  | –                               |
| Ovary to anterior testis %                           | 0                           | 0                 | 0–6 (0)               | 0                               | 0                           | 0                              | –                               |
| Distance between testes %                            | 0                           | 0                 | 0                     | 0                               | 0                           | 0–1.16 (0.53)                  | –                               |
| Cirrus-sac length %                                  | 22.2–27.0 (23.9)            | 12.5–18.5         | 17.9–25.9 (21.0)      | 21.0                            | 17.7–18.0                   | 23.4–24.8 (24.3)               | –                               |
| Pre-vitelline distance                               | 242–377 (330)               | 233 <sup>b</sup>  | 277–357 (321)         | 255                             | 370 <sup>b</sup>            | 319–480 (377)                  | 372                             |
| Pre-vitelline distance %                             | 25.9–26.6 (26.3)            | 29.5 <sup>b</sup> | 29.1–33.9 (31.2)      | 24.6                            | 23.3 <sup>b</sup>           | 23.2–36.5 (29.6)               | –                               |
| Oesophagus % of forebody                             | 6.50–7.46 (7.13)            | 0                 | 3.63–6.91 (5.13)      | 3.47                            | 9.24 <sup>b</sup>           | 0.80–13.0 (8.86)               | 3.67                            |
| IB-VS % of forebody                                  | 12.2–18.3 (16.2)            | 21.3 <sup>b</sup> | 9.83–17.8 (15.0)      | 14.3                            | 23.6 <sup>b</sup>           | 8.30–26.24 (14.99)             | 19.5                            |
| Vitellarium to ventral sucker distance % of forebody | 0–15.24 (5.08)              | 4.42 <sup>b</sup> | 0–11.3 (1.21)         | 0                               | 0 <sup>b</sup>              | 0–26.50 (12.28)                | 26.3                            |

<sup>a</sup> The single specimen of *Bianium plicitum* from *Torquigener pleurogramma* was a hologenophore.

<sup>b</sup> Measurement taken from illustration.

<sup>c</sup> All measurements from Hafeezullah (1970) taken from illustration.

§ including measurements of 3 recently collected specimens.

% = % of body-length where not otherwise noted; IB-VS = Intestinal bifurcation to ventral sucker distance.

Where length is followed by width, the two are separated by an '×'.

**Supplementary Table 2** Measurements and ratios of *Multitestis magnacetabulum*, *Neomultitestis aspidogastriformis*, *Opechona austroacillaris* and *Prodistomum keyam*.

| Species                                    | <i>Multitestis magnacetabulum</i>  | <i>Neomultitestis aspidogastriformis</i> | <i>Opechona austroacillaris</i> | <i>Prodistomum keyam</i>      |
|--------------------------------------------|------------------------------------|------------------------------------------|---------------------------------|-------------------------------|
| Host                                       | <i>Platax teira</i>                | <i>Platax teira</i>                      | <i>Pomatomus saltatrix</i>      | <i>Monodactylus argenteus</i> |
| Locality                                   | Moreton Bay                        | Moreton Bay                              | Moreton Bay                     | Moreton Bay                   |
| <i>n</i>                                   | 9                                  | 1                                        | 2                               | 4                             |
| Source                                     | This study                         | This study                               | This study                      | This study                    |
| Body                                       | 392–1,029 × 469–772<br>(618 × 606) | 733 × 889                                | 3,043–4,238 × 340–472           | 506–675 × 169–209 (578 × 193) |
| Forebody                                   | 194–282 (224)                      | 288                                      | 1,039–1,328                     | 247–325 (287)                 |
| Pre-oral lobe                              | 2–22 (6)                           | 9                                        | 0                               | 0–3 (1)                       |
| Oral sucker                                | 91–147 × 104–166<br>(112 × 135)    | 136 × 179                                | 278–376 × 224–243               | 47–55 × 50–56 (51 × 53)       |
| Prepharynx                                 | 0                                  | 0                                        | 78–100                          | 33–67 (53)                    |
| Pharynx                                    | 63–126 × 72–106 (87 × 88)          | 101 × 111                                | 105–132 × 102–113               | 44–48 × 31–36 (46 × 34)       |
| Oesophagus + pseudoesophagus               | –                                  | –                                        | 549–660                         | –                             |
| Oesophagus                                 | 0                                  | 0                                        | 52–55                           | 19–37 (25)                    |
| Pseudoesophagus                            | –                                  | –                                        | 487–605                         | –                             |
| Intestinal bifurcation to ventral sucker   | 0–110 (57)                         | 115                                      | 57–60                           | 88–135 (110)                  |
| Vitellarium to ventral sucker              | 115–200 (156)                      | 176                                      | 181–236                         | 99–110 (104)                  |
| Ventral sucker                             | 114–195 × 199–310<br>(156 × 235)   | 212 × 525                                | 155–191 × 141–175               | 49–59 × 55–63 (54 × 58)       |
| Cirrus-sac                                 | 166–353 × 58–128<br>(217 × 85)     | 318 × 135                                | 326–402 × 79–111                | 96–108 × 43–47 (102 × 45)     |
| External seminal vesicle to ventral sucker | –                                  | –                                        | 270–420                         | –                             |
| Ventral sucker to ovary                    | 0                                  | 0                                        | 577–754                         | 16–102 (41)                   |
| Ovary                                      | 65–112 × 73–167 (89 × 113)         | 111 × 121                                | 143–176 × 129–159               | 46–67 × 43–50 (52 × 45)       |
| Ovary to anterior testis                   | 0–49 (14)                          | 0                                        | 14–84                           | 0                             |
| Anterior testis                            | 167–298 × 133–266<br>(218 × 193)   | 230 × 620                                | 215–265 × 214–197               | 59–72 × 67–81 (66 × 73)       |
| Distance between testes                    | 89–193 (133)                       | 0                                        | 2–42                            | 0                             |

| Species                                                  | <i>Multitestis magnacetabulum</i> | <i>Neomultitestis aspidogastriformis</i> | <i>Opechona austrobacillaris</i> | <i>Prodistomum keyam</i>      |
|----------------------------------------------------------|-----------------------------------|------------------------------------------|----------------------------------|-------------------------------|
| Host                                                     | <i>Platax teira</i>               | <i>Platax teira</i>                      | <i>Pomatomus saltatrix</i>       | <i>Monodactylus argenteus</i> |
| Locality                                                 | Moreton Bay                       | Moreton Bay                              | Moreton Bay                      | Moreton Bay                   |
| <i>n</i>                                                 | 9                                 | 1                                        | 2                                | 4                             |
| Source                                                   | This study                        | This study                               | This study                       | This study                    |
| Posterior testis                                         | 174–316 × 142–255<br>(231 × 200)  | 37 × 42                                  | 243–280 × 195–215                | 73–89 × 79–100 (80 × 85)      |
| Post-testicular distance                                 | 141–442 (230)                     | 246                                      | 626–1,084                        | 60–82 (69)                    |
| Post-caecal distance                                     | –                                 | –                                        | 13–27                            | 44–55 (50)                    |
| Eggs                                                     | 43–54 × 23–31 (50 × 28)           | 52 × 31                                  | 82–90 × 41–48                    | 54–59 × 26–38 (57 × 31)       |
| Width %                                                  | 75–120 (102)                      | 121                                      | 11.1–11.2                        | 30.9–37.2 (33.6)              |
| Forebody %                                               | 27.4–49.4 (37.6)                  | 39.4                                     | 31.3–34.1                        | 48.1–52.7 (49.7)              |
| Sucker length ratio 1:                                   | 1.26–1.65 (1.40)                  | 1.56                                     | 0.51–0.56                        | 1.02–1.11 (1.07)              |
| Sucker width ratio 1:                                    | 1.59–1.91 (1.75)                  | 2.93                                     | 0.63–0.72                        | 1.01–1.14 (1.09)              |
| Oral sucker: pharynx width 1:                            | 1.26–1.83 (1.53)                  | 1.61                                     | 2.14–2.20                        | 1.49–1.75 (1.60)              |
| Ventral sucker to ovary %                                | 0                                 | 0                                        | 17.8–18.9                        | 3.13–15.1 (6.59)              |
| External seminal vesicle to ventral sucker % of VS-Ovary | –                                 | –                                        | 46.8–55.7                        | –                             |
| Post-testicular distance %                               | 29.8–43.0 (36.5)                  | 33.6                                     | 20.6–25.6                        | 8.94–13.7 (12.0)              |
| Prepharynx %                                             | 0                                 | 0                                        | 7.52–7.53                        | 3.11–5.50 (4.23)              |
| Oesophagus %                                             | 0                                 | 0                                        | 15.1–17.6                        | 17.5–22.5 (19.0)              |
| Oesophagus: pseudoesophagus ratio 1:                     | –                                 | –                                        | 10.6–11.0                        |                               |
| IB-VS %                                                  | 0–14.3 (9.12)                     | 15.8                                     | 1.41–1.87                        | 16.2–20.3 (18.2)              |
| Vitellarium to ventral sucker distance %                 | 16.1–45.5 (27.0)                  | 24.0                                     | 5.56–5.94                        | 0                             |
| Ovary to anterior testis %                               | 0–8.01 (1.70)                     | 0                                        | 0–1.99                           | 0                             |
| Distance between testes %                                | 16.1–26.0 (21.9)                  | 0                                        | 0–1.00                           | 18.0–18.9 (18.5)              |
| Cirrus-sac length %                                      | 24.3–48.4 (35.9)                  | 43.5                                     | 9.49–10.7                        | 145–215 (183)                 |
| Pre-vitelline distance                                   | 15–116 (67)                       | 112                                      | 858–1,093                        | 28.6–35.3 (31.6)              |
| Pre-vitelline distance %                                 | 3.86–17.3 (10.6)                  | 15.3                                     | 25.8–28.2                        | 13.3–20.5 (18.2)              |
| Oesophagus % of forebody                                 | 0                                 | 0                                        | –                                | 5.90–11.4 (8.56)              |
| Oesophagus + pseudoesophagus % of forebody               | –                                 | –                                        | 49.7–52.9                        | –                             |

|                                                      |                                   |                                          |                                  |                               |
|------------------------------------------------------|-----------------------------------|------------------------------------------|----------------------------------|-------------------------------|
| Species                                              | <i>Multitestis magnacetabulum</i> | <i>Neomultitestis aspidogastriformis</i> | <i>Opechona austrobacillaris</i> | <i>Prodistomum keyam</i>      |
| Host                                                 | <i>Platax teira</i>               | <i>Platax teira</i>                      | <i>Pomatomus saltatrix</i>       | <i>Monodactylus argenteus</i> |
| Locality                                             | Moreton Bay                       | Moreton Bay                              | Moreton Bay                      | Moreton Bay                   |
| <i>n</i>                                             | 9                                 | 1                                        | 2                                | 4                             |
| Source                                               | This study                        | This study                               | This study                       | This study                    |
| IB-VS % of forebody                                  | 0–40.2 (24.9)                     | 40.0                                     | 4.51–5.48                        | 35.7–42.6 (38.1)              |
| Vitellarium to ventral sucker distance % of forebody | 58.4–92.2 (70.5)                  | 61.1                                     | 17.4–17.7                        | 33.0–41.5 (36.6)              |

% = % of body-length where not otherwise noted; IB-VS = Intestinal bifurcation to ventral sucker distance.

Where length is followed by width, the two are separated by an ‘×’.
